# Supplementary material for: 3D silk fibroin/carbon nanotube array composite matrix for flexible solid-state supercapacitors
Source: Royal Society of Chemistry journal article supplement (doi:10.1039/d0nj00351d), 2020-01-01
Supplement: d0nj00351d1.pdf [file d0nj00351d1.pdf]

Electronic supplementary information for New Journal of Chemistry

## 3D silk fibroin/carbon nanotube array composite matrix for flexible solid-state supercapacitors

Mingyue Yang,<sup>a</sup> Xian Zeng,<sup>a</sup> Xiaohua Zhang<sup>\*ab</sup> Zhaohui Yang,<sup>\*ab</sup>

<sup>a</sup> Center for Soft Condensed Matter Physics and Interdisciplinary Research & School of Physical Science and Technology, Soochow University, Suzhou 215006, China

<sup>b</sup> Jiangsu Key Laboratory of Thin Films, Soochow University, Suzhou 215006, People's Republic of China

\* E-mail: zhangxiaohua@suda.edu.cn; yangzhaohui@suda.edu.cn

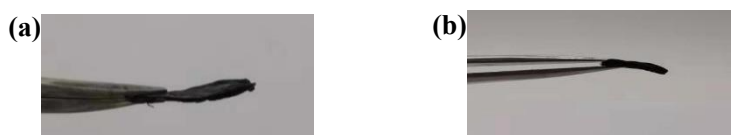

**Figure S1.** The images of CNTA@SF and CNTA@C recovering to initial state.

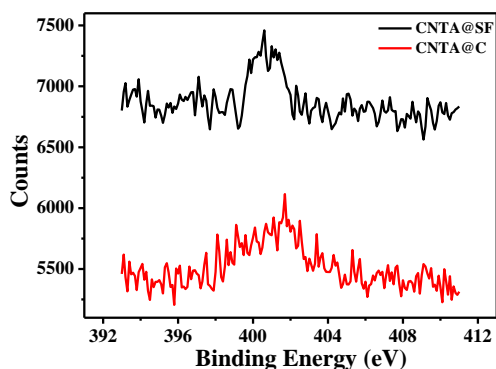

**Figure S2.** N 1s spectra of CNTA@SF and CNTA@C composites.

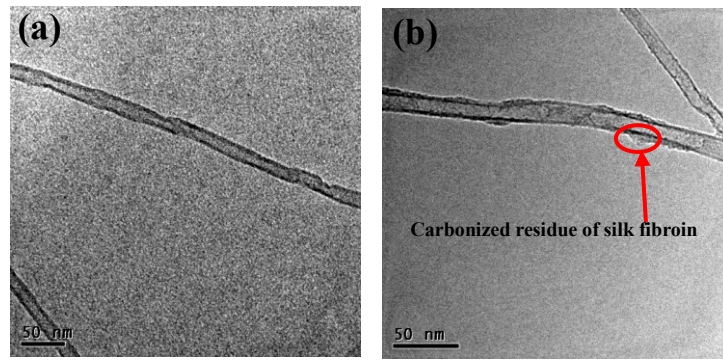

**Figure S3.** TEM images of CNTA@SF and CNTA@C composites
